# Supplementary material
Source: Springer Nature journal article supplement (https://www.springermedizin.de/resource/supplementary/12889_2008_1623_MOESM2_ESM.pdf/9503574)

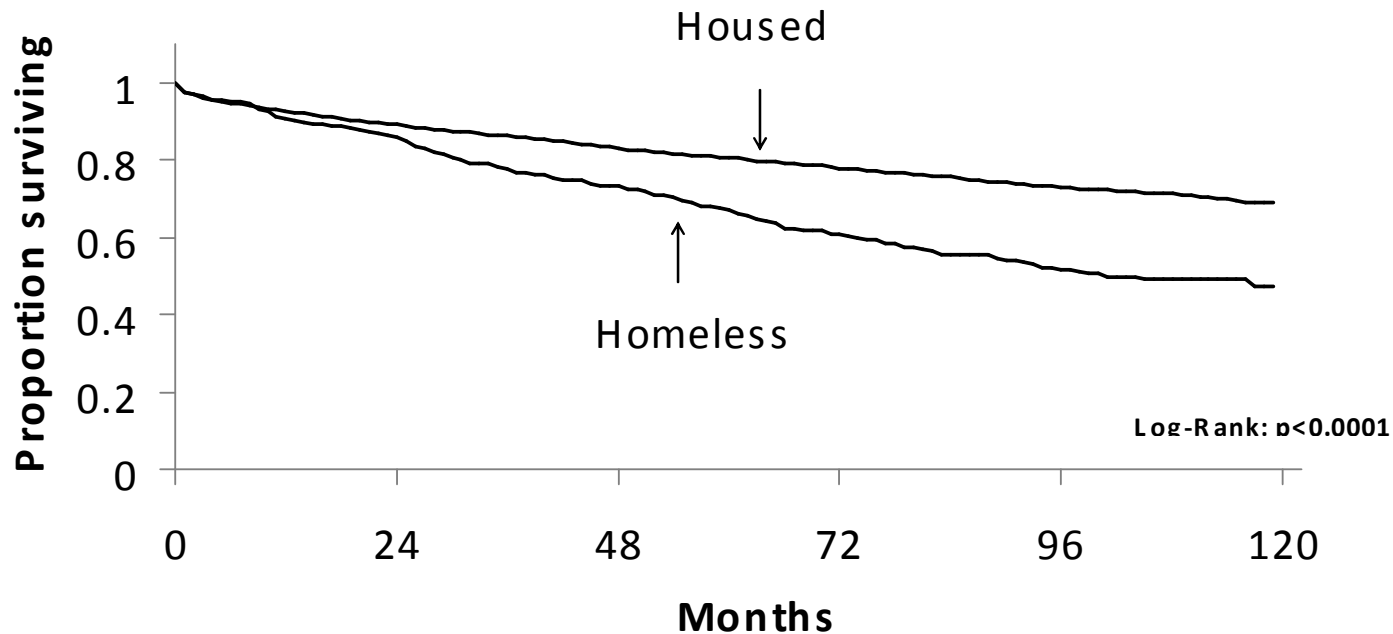

### No. at Risk

|          |      |      |      |      |      |     |
|----------|------|------|------|------|------|-----|
| Homeless | 640  | 487  | 351  | 204  | 96   | 23  |
| Housed   | 5913 | 4637 | 3571 | 2607 | 1703 | 571 |

Excludes five cases without follow-up data.

Supplement: MOESM2 [file 9503574]
